# Supplementary material for: Mate Choice and the Origin of Menopause
Source: PLoS Comput Biol. 2013 Jun 13;9(6):e1003092. doi: 10.1371/journal.pcbi.1003092 (PMC3681637; doi:10.1371/journal.pcbi.1003092)
Supplement: Table S2 — Mating preference matrix MAP. (XLS) [file pcbi.1003092.s002.xls]

## Sheet: Sheet1
Table S2. Mating preference matrix MAP.
			Mother's Age Class
	Age class interval	0	0 to 5-	5 to 10-	10 to 15-	15 to 20-	20 to 25-	25 to 30-	30 to 35-	35 to 40-	40 to 45-	45 to 50-	50 to 55-	55 to 60-	60 to 65-	65 to 70-	70 to 75-	75 to 80-	80 to 85-	85 to 90-
Father's Age Class	0	0	0	0	0	0	0	0	0	0	0	0	0	0	0	0	0	0	0	0
	0 to 5-	0	0	0	0	0	0	0	0	0	0	0	0	0	0	0	0	0	0	0
	5 to 10-	0	0	0	0	0	0	0	0	0	0	0	0	0	0	0	0	0	0	0
	10 to 15-	0	0	0	1	1	1	1	1	1	1	1	1	1	1	1	1	1	1	1
	15 to 20-	0	0	0	1	1	1	1	1	1	1	1	1	1	1	1	1	1	1	1
	20 to 25-	0	0	0	1	1	1	1	1	1	1	1	1	1	1	1	1	1	1	1
	25 to 30-	0	0	0	1	1	1	1	1	1	1	1	1	1	1	1	1	1	1	1
	30 to 35-	0	0	0	1	1	1	1	1	1	1	1	1	1	1	1	1	1	1	1
	35 to 40-	0	0	0	1	1	1	1	1	1	1	1	1	1	1	1	1	1	1	1
	40 to 45-	0	0	0	1	1	1	1	1	1	1	1	1	1	1	1	1	1	1	1
	45 to 50-	0	0	0	1	1	1	1	1	1	1	1	1	1	1	1	1	1	1	1
	50 to 55-	0	0	0	1	1	1	1	1	1	1	1	1	1	1	1	1	1	1	1
	55 to 60-	0	0	0	1	1	1	1	1	1	1	1	1	1	1	1	1	1	1	1
	60 to 65-	0	0	0	1	1	1	1	1	1	1	1	1	1	1	1	1	1	1	1
	65 to 70-	0	0	0	1	1	1	1	1	1	1	1	1	1	1	1	1	1	1	1
	70 to 75-	0	0	0	1	1	1	1	1	1	1	1	1	1	1	1	1	1	1	1
	75 to 80-	0	0	0	1	1	1	1	1	1	1	1	1	1	1	1	1	1	1	1
	80 to 85-	0	0	0	1	1	1	1	1	1	1	1	1	1	1	1	1	1	1	1
	85 to 90-	0	0	0	1	1	1	1	1	1	1	1	1	1	1	1	1	1	1	1
